# Supplementary material for: Ruthenium-based medium-entropy alloy oxide for hydrogen evolution linked to biomass sucrose upcycling
Source: Royal Society of Chemistry journal article supplement (doi:10.1039/d5tc01495f), 2025-01-01
Supplement: d5tc01495f1.pdf [file d5tc01495f1.pdf]

## **Supporting information (SI) for**

### **Ruthenium-based medium-entropy alloy oxide for hydrogen evolution linking to biomass sucrose upcycling**

Gen Liu<sup>a</sup>, Jingjing Yang<sup>a</sup>, Wangxi Fan<sup>a</sup>, Shuang Dong<sup>b,\*</sup>, and Zhou Yang<sup>a,\*</sup>

<sup>a</sup>. Department of Chemistry and Chemical Engineering, Jiangsu University of Technology, Changzhou 213001, China.

<sup>b</sup>. School of Chemical Engineering and Materials, Changzhou Institute of Technology, Changzhou 213032, China.

\*Correspondence: Zhou Yang, [zhouyang@jsut.edu.cn](mailto:zhouyang@jsut.edu.cn). Shuang Dong, [dongs@czu.cn](mailto:dongs@czu.cn).

## Characterizations

The microstructure was observed by a field-emission scanning electron microscope (FE-SEM, Sigma 500), and transmission electron microscopy (TEM, JEM-2100) with selected area electron diffraction (SAED) and energy dispersive spectrometer (EDS). The chemical properties were scanned by X-ray diffraction (XRD, X'PERT POWDER, scanning rate is  $10^{\circ} \text{ min}^{-1}$ ) and X-ray photoelectron spectroscopy (XPS, ThermoFisher Scientific ESCALAB 250, Al target). The contents of Ru and Pd were tested by inductive coupled plasma-optical emission spectrometry (ICP-OES, Plasma 2000). The chemical product is characterized by  $^1\text{H}$  nuclear magnetic resonance (NMR, Bruker Avance III HD, 400 MHz, solution is  $\text{D}_2\text{O}$ ) and high-performance liquid chromatography (HPLC, Agilent 1260 series equipped with a UV detector, which was operated at 210 nm with Bio-Rad Aminex HPX-87H column at  $50^{\circ}\text{C}$ , 5 mM of  $\text{H}_2\text{SO}_4$  was used as the eluent with flow rate of  $0.5 \text{ mL min}^{-1}$ ). The electrochemical measurements were performed by an electrochemical workstation (Chenhua, CHI 760E) including cyclic voltammetry (CV), linear sweep voltammetry (LSV), Chronopotentiometry (CP), electrochemical impedance spectroscopy (EIS), impedance-potential, and intensity-time (i-t) curve.

In the three-electrode system, 2 mg of sample was dispersed in 200  $\mu\text{L}$  of mixed solution (deionized water: ethanol: Nafion = 2:7:1) to form ink, and then 10  $\mu\text{L}$  of above ink was dripped on a glass carbon electrode (GCE) and dried at room temperature, which was used as the working electrode, and the  $\text{Hg/HgO}$  and graphite electrodes were used as the reference and counter electrodes, respectively. In the two-electrode system, the sample was fully mixed with acetylene black and polyvinylidene fluoride (PVDF) with a weight ratio of 8:1:1, and dispersed in appropriate N-methylpyrrolidone (NMP) to form slurry. The above slurry was coated on the nickel foam ( $1 \times 1 \text{ cm}$ ) and dried. The test was performed in the C008-1 3H cell separated by the perfluorosulfonic acid proton exchange membrane.

The electrochemically active surface (ECSA) was calculated on the basis of the double-layer capacitance ( $C_{\text{dl}}$ ) theory,<sup>1</sup>

$$\text{ECSA} = C_{\text{dl}} / C_s$$

Where the slope in the plot of current densities to scan rates stands for  $2C_{dl}$ , and  $C_s$  is  $0.04 \text{ mF cm}^{-2}$ .

### **Faradaic efficiency (*FE*), conversion, and selectivity of SOR**

The half-reaction formula for product from SOR in 1 M KOH+0.1 M sucrose is listed as follows:

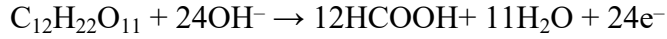

*FE* of SOR is calculated based on the following equation:

$$FE (\%) = \frac{24 \times CHCOOH}{Q} \times V \times F \times 100\%$$

Where,  $C_{HCOOH}$  is the concentration ( $\text{mol L}^{-1}$ ) of FA;  $V$  is the volume of tested electrolyte ( $10 \times 10^{-3} \text{ L}$ );  $F$  is the Faradaic constant ( $96485 \text{ C mol}^{-1}$ );  $Q$  is the total charge (C) passed during electrochemical reaction.<sup>2</sup>

$$\text{Conversion (\%)} = 1 - \frac{n_{sucrose}}{n_{sucrose0}} \times 100\%$$

$$\text{Selectivity (\%)} = \frac{n_{HCOOH}}{n_{products}} \times 100\%$$

Where,  $n_{sucrose}$  is the mol of sucrose,  $n_{sucrose0}$  is the mol of original sucrose,  $n_{HCOOH}$  is the mol of FA, and  $n_{products}$  is the mol of all products.

## Supplementary figures

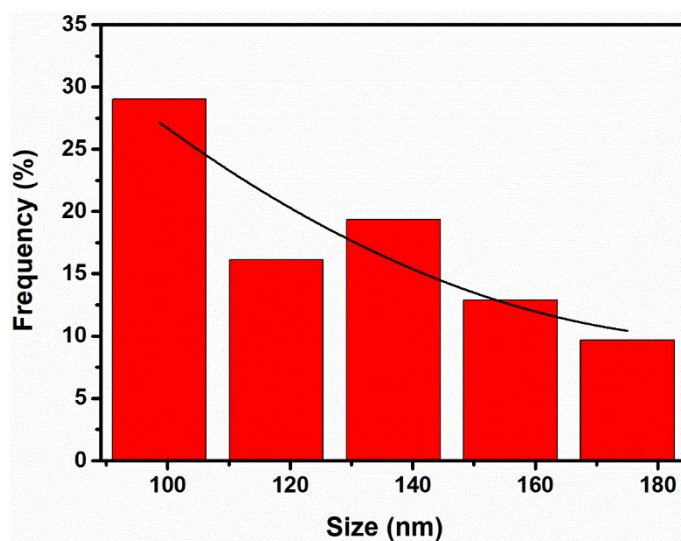

**Fig. S1.** Particle size distribution of Ru<sub>0.5</sub>Pd<sub>0.5</sub>O<sub>2</sub>.

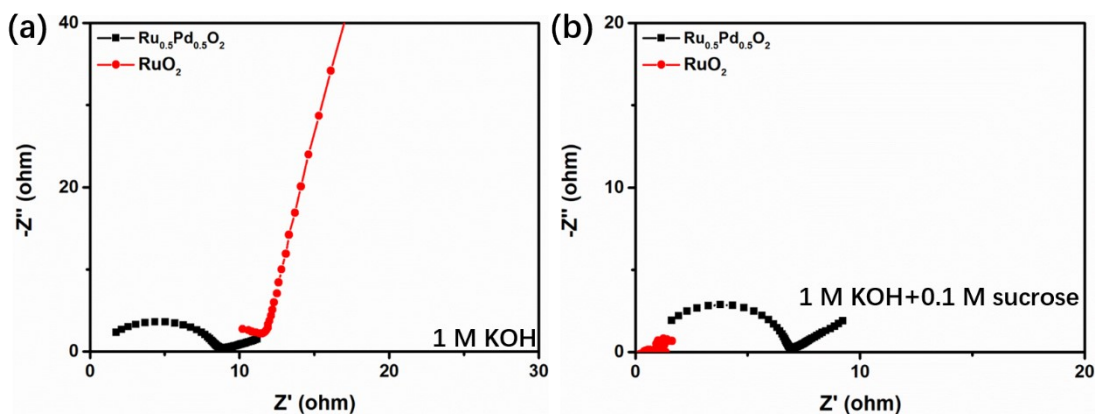

**Fig. S2.** EIS plots of Ru<sub>0.5</sub>Pd<sub>0.5</sub>O<sub>2</sub> and RuO<sub>2</sub> in (a) 1 M KOH and (b) 1 M KOH+0.1 M sucrose. (All the EIS test at Amplitude = 0.005 V from 1 HZ to 10<sup>5</sup> HZ).

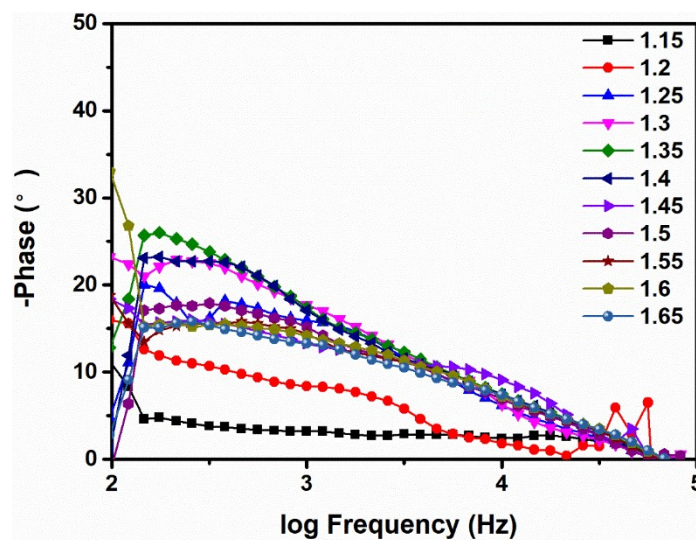

**Fig. S3.** *In-situ* bode plots of Ru<sub>0.5</sub>Pd<sub>0.5</sub>O<sub>2</sub> in 1 M KOH+0.1 M sucrose.

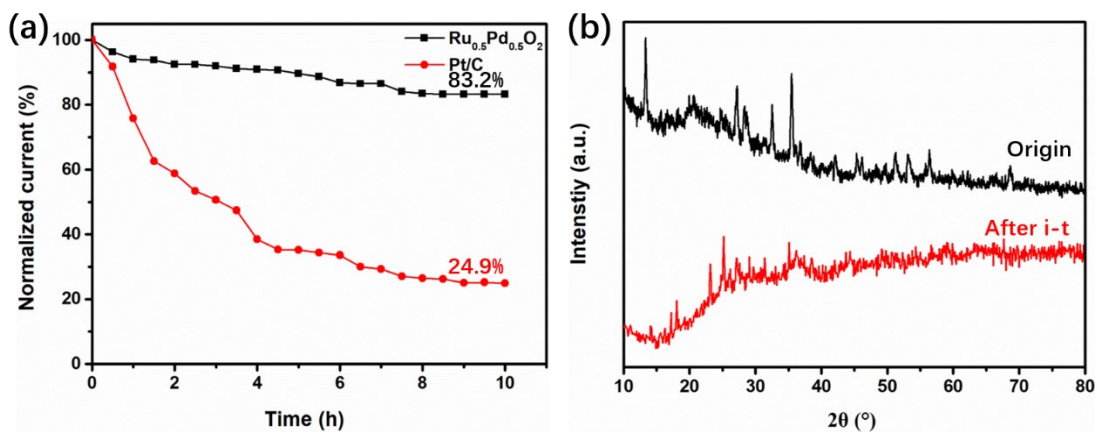

**Fig. S4.** (a) I-t plots of Ru<sub>0.5</sub>Pd<sub>0.5</sub>O<sub>2</sub> and Pt/C in 1 M KOH+0.1 M sucrose. (b) XRD pattern of Ru<sub>0.5</sub>Pd<sub>0.5</sub>O<sub>2</sub> after i-t test.

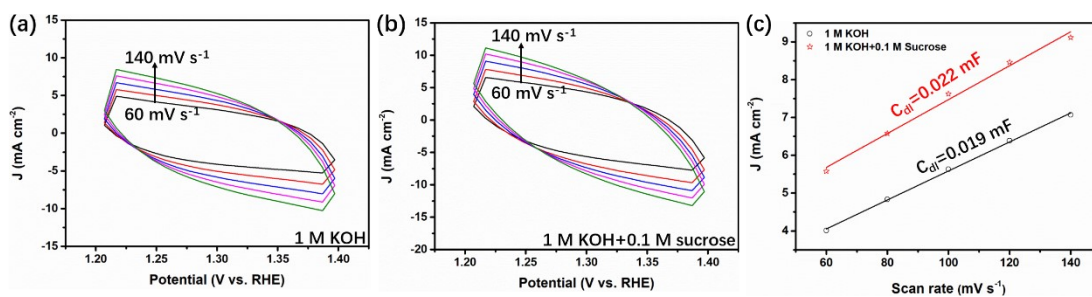

**Fig. S5.** CV curves at different scan rates of Ru<sub>0.5</sub>Pd<sub>0.5</sub>O<sub>2</sub> in (a) 1 M KOH and (b) 1 M KOH+0.1 M sucrose. (c) Plots of current density to scan rates.

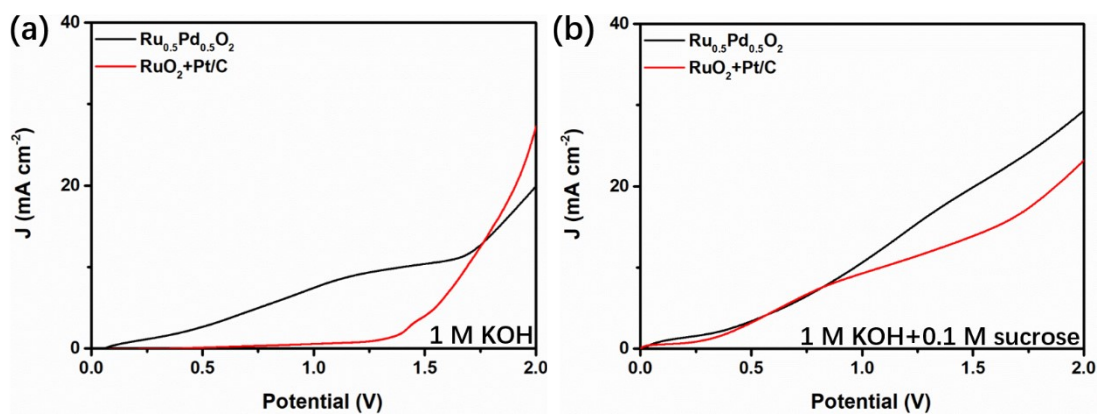

**Fig. S6.** Overall water splitting LSV curves of Ru<sub>0.5</sub>Pd<sub>0.5</sub>O<sub>2</sub> and RuO<sub>2</sub>+Pt/C system in (a) 1 M KOH and (b) 1 M KOH+0.1 M sucrose.

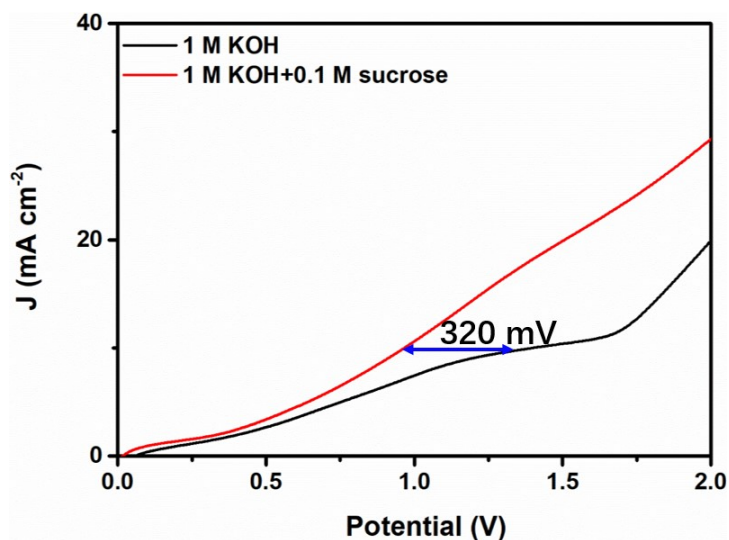

**Fig. S7.** Overall water splitting LSV curves of  $\text{Ru}_{0.5}\text{Pd}_{0.5}\text{O}_2$  in 1 M KOH and 1 M KOH+0.1 M sucrose.

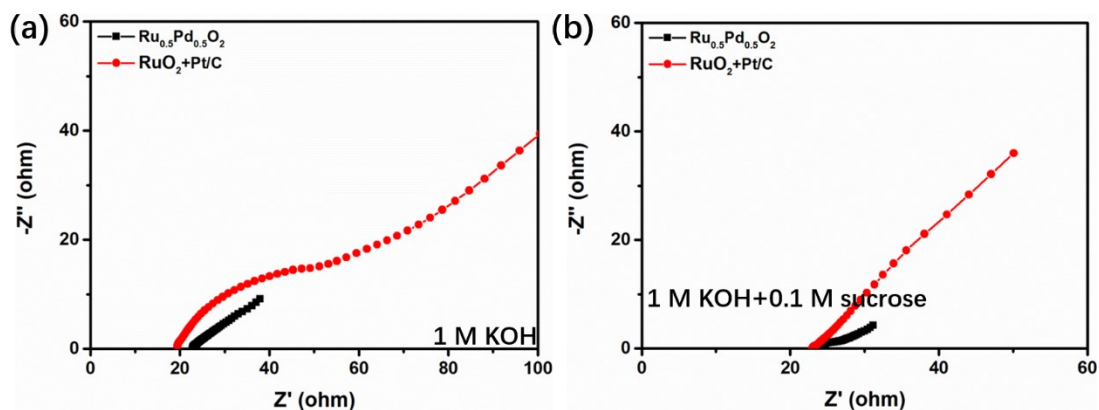

**Fig. S8.** EIS plots of  $\text{Ru}_{0.5}\text{Pd}_{0.5}\text{O}_2$  and  $\text{RuO}_2+\text{Pt}/\text{C}$  system in (a) 1 M KOH and (b) 1 M KOH+0.1 M sucrose by the two-electrode method. (All the EIS test at Amplitude = 0.005 V from 1 Hz to  $10^5$  Hz).

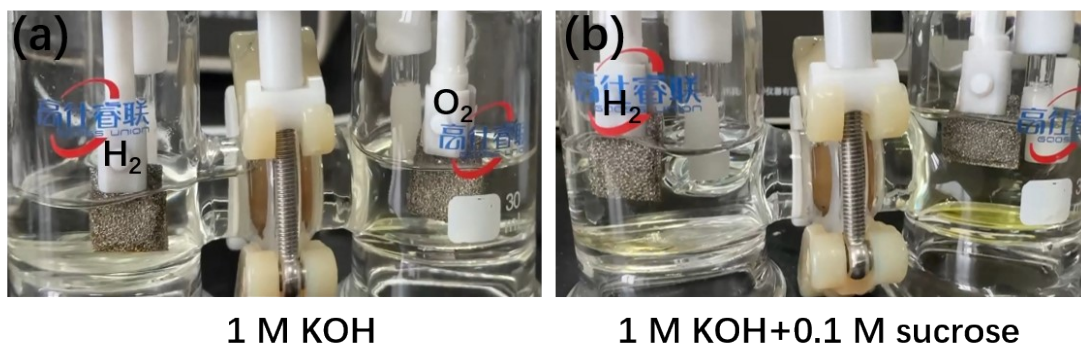

**Fig. S9.** Overall water splitting photos of  $\text{Ru}_{0.5}\text{Pd}_{0.5}\text{O}_2$  loading on Ni foams in (a) 1 M KOH and (b) 1 M KOH+0.1 M sucrose.

### Supplementary tables

**Table S1.** The contents of metals in the MEAO tested by ICP-OES

| MEAO                                       | Content of Ru<br>(ppm) | Content of Pd<br>(ppm) | Molar ratio of Ru to<br>Pd |
|--------------------------------------------|------------------------|------------------------|----------------------------|
| $\text{Ru}_{0.5}\text{Pd}_{0.5}\text{O}_2$ | 585.9                  | 573.2                  | 1.07                       |

## References

1. Z. Yang, H. Chen, M. Xiang, C. Yu, J. Hui and S. Dong, *Int. J. Hydrogen Energy*, 2022, 47, 31566-31574.
2. Y. Liu, Z. Chen, Y. Yang, R. Zou, B. Deng, L. Zhong, K. P. Loh and X. Peng, *Appl. Catal., B*, 2024, 331, 122559.
